# Supplementary material
Source: publisher figshare collection journal article supplement (https://rs.figshare.com/ndownloader/files/10667491)
Supplement: Supplementary file 1 [file 10667491]

## Supplementary Methods

### *Details of the GMPD*

The Global Mammal Parasite Database 2.0 (GMPD) [1] contains host-parasite association records reported from literature for free-ranging populations from the mammalian orders Artiodactyla, Perissodactyla, Carnivora, and Primates. The database includes both positive and negative records (i.e., cases where a parasite was sampled for but not found in a given host). In this study, we limited our data analysis to ungulate species and excluded primarily domestic species (e.g., camels). We also included only populations sampled in their native ranges (following [2] and [3]). The GMPD uses the taxonomy of Wilson & Reeder [4], but to harmonize these data with the PanTHERIA database used in some analyses [5], we collapsed two pairs of species together where taxonomies disagreed (*Alces americanus* was included within *Alces alces* and *Alcelaphus liechtensteinii* was included within *Alcelaphus buselaphus*).

### *Calculations of parasite species richness*

We used the parasite taxonomy provided in the GMPD to identify unique parasite operational taxonomic units (OTUs); we refer to these unique parasite OTUs as “species” throughout the manuscript, even though some parasite types (e.g. viruses) are not identified as species. We defined parasite species richness as the number of parasite species detected in all native, free-ranging populations of a host species [2,6,7]. For parasites that were identified only to the genus level, we included these in the richness measure only if no other species from that genus was also present in a given host species (e.g. *Strongyloides* sp. was counted as a unique parasite only if no other species of *Strongyloides* had been detected in that host). We excluded any records that were identified to the family level or above.

We used the Chao2 estimator to account for uneven sampling effort. The Chao2 estimator is based on the ratio of singletons to doubletons in the dataset; we selected it for this study

because it has been shown to accurately predict species richness when data is in the form of presence-absence records and sample sizes for some sites or species are low [8–10]; it also performs better than other diversity estimators on the GMPD data [7].

Prevalence data were recorded for 89% of entries included in this analysis. These prevalence data are based either on direct detection of pathogens (by visible stages or using genetic markers) or detection of host antibodies (e.g., seroprevalence), and thus can represent either active infection or previous exposure to a given parasite.

### ***Movement data compilation***

To gather data on the movement strategy of each ungulate host species, we first searched for species reports in the journal *Mammalian Species*, which provides descriptions of species' ecology. If no *Mammalian Species* report was available for a given ungulate host or the movement strategy was not clear from the report, we searched Google Scholar for the species' binomial name along with “movement OR seasonal OR migration OR ‘home range’ OR nomadic OR nomadism OR sedentary OR resident”, using synonyms from all known taxonomies (e.g. [4,11]). If there was no movement description in either *Mammalian Species* or in these articles, we searched the online databases Animal Diversity Web and Ultimate Ungulate for description of movement patterns.

To categorize populations' movement patterns, we used the following definitions, based on those by Mueller *et al.* [12,13]: a population was considered *migratory* if it showed seasonal and typically long-distance differences in location but little inter-annual variability in seasonal range use. *Nomadic* populations were those whose location was described as differing across the year but in an irregular and/or resource-driven manner. Most often, these descriptions included phrases such as “may travel long distances in search of food,” “migrates to [location] in some years and elsewhere in others,” and “has unpredictable movements.” Last, *resident* populations

were characterized by limited seasonal differences in location or home range. Most often, these assessments came from descriptions of high home range overlap between seasons or year-round territorial maintenance. In addition, any species where no migration or nomadism was described in any available source were considered resident. Under our hierarchical classifications of movement behavior, we did not consider partial migration or partial nomadism explicitly because of the difficulty in accurately defining these behaviors [14], and because our questions revolve around overall effects of migration on the species level, meaning that we consider any degree of migratory behavior as having a potential effect on infection.

#### ***Life-history and geographic range data***

In PanTHERIA, adult body mass is the average mass of non-pregnant adult specimens of either sex from captive, wild, or provisioned populations. Population group size is the average number of individuals in a non-captive population that spends the majority of their time in a day together and is roughly equivalent to herd size for ungulates [5]. PanTHERIA also provides other measures of group size, but we considered population group size the most relevant to parasite transmission.

We gathered geographic data from species distribution maps downloaded from the IUCN Red List [11], from which we calculated the range area (in km<sup>2</sup>) and the mid-range latitude of each ungulate species. We also quantified the diversity of habitats used by each species using WWF's definitions of ecoregions, which are geographic areas defined by characteristic biotic assemblages and abiotic conditions [15]. For each species, we counted the number of unique ecoregions that overlapped with the species' geographic range (from IUCN range maps) as a measure of habitat diversity.

### ***Data analysis***

During our model selection process, we excluded any models that included both geographic range area and number of ecoregions to increase the accuracy of our parameter estimates (following [16]). Model averaging performs well when predictor variables are moderately collinear, but still results in biased parameter estimates when predictor variables are highly collinear, as is the case here ( $r=0.90$  after log transformation) [17].

In our models that explicitly accounted for sampling effort, we used the number of hits for a species' Latin binomial on Web of Science as our measure of sampling effort, following other studies using similar datasets [2,18,6,7]. WOS citation count reflects the overall effort spent on studying the biology of a species. In this model set, we used log-transformed observed parasite species richness as the response variable; included log-transformed sampling effort as an additional explanatory variable; and a weighting scheme based on the number of individuals sampled per species in the GMPD ( $\text{weight} = 1/(\log(\text{number of individuals}) + 1)$ ).

In our models that examined different parasite groups separately, we first estimated parasite richness of each parasite group in each host species using the Chao2 estimator. Because of the smaller sample sizes for these subsetted data, we included only variables with importance  $>0.5$  in the full model set as candidate explanatory variables, which were movement strategy, number of ecoregions, and body mass.

In our analysis of prevalence data, for each positive host-parasite interaction where at least five host individuals were sampled, we estimated the average prevalence of each parasite in each host species, (following [19] and [20]). Then, for each parasite species, we calculated the average prevalence in migratory and resident hosts separately, and found the difference between these values. A positive value indicates that the average migratory species has higher prevalence than the average resident species for a given parasite.

## References

1. Stephens, P. R. et al. 2017 Global Mammal Parasite Database version 2.0. *Ecology* **98**, 1476.
2. Ezenwa, V. O., Price, S. A., Altizer, S., Vitone, N. D. & Cook, K. C. 2006 Host traits and parasite species richness in even and odd-toed hoofed mammals, Artiodactyla and Perissodactyla. *Oikos* **115**, 526–536. (doi:10.1111/j.2006.0030-1299.15186.x)
3. Farrell, M. J., Stephens, P. R., Berrang-Ford, L., Gittleman, J. L. & Davies, T. J. 2015 The path to host extinction can lead to loss of generalist parasites. *J. Anim. Ecol.* **84**, 978–984. (doi:10.1111/1365-2656.12342)
4. Wilson, D. E. & Reeder, D. M., Eds. 2005 *Mammal Species of the World: a Taxonomic and Geographic Reference*. JHU Press.
5. Jones, K. E. et al. 2009 PanTHERIA: a species-level database of life history, ecology, and geography of extant and recently extinct mammals. *Ecology* **90**, 2648.
6. Lindenfors, P., Nunn, C. L., Jones, K. E., Cunningham, A. A., Sechrest, W. & Gittleman, J. L. 2007 Parasite species richness in carnivores: Effects of host body mass, latitude, geographical range and population density. *Glob. Ecol. Biogeogr.* **16**, 496–509. (doi:10.1111/j.1466-8238.2006.00301.x)
7. Huang, S., Drake, J. M., Gittleman, J. L. & Altizer, S. 2015 Parasite diversity declines with host evolutionary distinctiveness: A global analysis of carnivores. *Evolution.* **69**, 621–630. (doi:10.1111/evo.12611)
8. Alroy, J. 2017 Effects of habitat disturbance on tropical forest biodiversity. *Proc. Natl. Acad. Sci. U. S. A.* **114**, 6056–6061. (doi:10.1073/pnas.1611855114)
9. Dove, A. D. M. & Cribb, T. H. 2006 Species accumulation curves and their applications in parasite ecology. *Trends Parasitol.* **22**, 568–574. (doi:10.1016/j.pt.2006.09.008)
10. Walther, B. A. & Moore, J. L. 2005 The concept of bias, precision and accuracy, and their use in testing the performance of species richness estimators, with a literature review of estimators. *Ecography.* **28**, 815–829.
11. IUCN 2016 The IUCN Red List of Threatened Species. Version 2016-1.
12. Mueller, T. et al. 2011 How landscape dynamics link individual- to population-level movement patterns: a multispecies comparison of ungulate relocation data. *Glob. Ecol. Biogeogr.* **20**, 683–694. (doi:10.1111/j.1466-8238.2010.00638.x)
13. Mueller, T. & Fagan, W. 2008 Search and navigation in dynamic environments—from individual behaviors to population distributions. *Oikos* **117**, 654–664. (doi:10.1111/j.2008.0030-1299.16291.x)
14. Bunnefeld, N., Börger, L., van Moorter, B., Rolandsen, C. M., Dettki, H., Solberg, E. J. & Ericsson, G. 2011 A model-driven approach to quantify migration patterns: individual, regional and yearly differences. *J. Anim. Ecol.* **80**, 466–76. (doi:10.1111/j.1365-2656.2010.01776.x)
15. Olson, D. M. et al. 2001 Terrestrial ecoregions of the world: a new map of life on Earth. *Bioscience* **51**, 933–938.
16. Bellwood, D. R., Hughes, T. P., Connolly, S. R. & Tanner, J. 2005 Environmental and geometric constraints on Indo-Pacific coral reef biodiversity. *Ecol. Lett.* **8**, 643–651. (doi:10.1111/j.1461-0248.2005.00763.x)
17. Freckleton, R. P. 2011 Dealing with collinearity in behavioural and ecological data: Model averaging and the problems of measurement error. *Behav. Ecol. Sociobiol.* **65**, 91–

101. (doi:10.1007/s00265-010-1045-6)
18. Nunn, C. L. L., Altizer, S., Jones, K. E. E. & Sechrest, W. 2003 Comparative tests of parasite species richness in primates. *Am. Nat.* **162**, 597–614. (doi:10.1086/378721)
  19. Altizer, S., Nunn, C. L. & Lindenfors, P. 2007 Do threatened hosts have fewer parasites? A comparative study in primates. *J. Anim. Ecol.* **76**, 304–314. (doi:10.1111/j.1365-2656.2007.01214.x)
  20. Young, H., Griffin, R. H., Wood, C. L. & Nunn, C. L. 2013 Does habitat disturbance increase infectious disease risk for primates? *Ecol. Lett.* **16**, 656–663. (doi:10.1111/ele.12094)

## Supplementary figures and tables

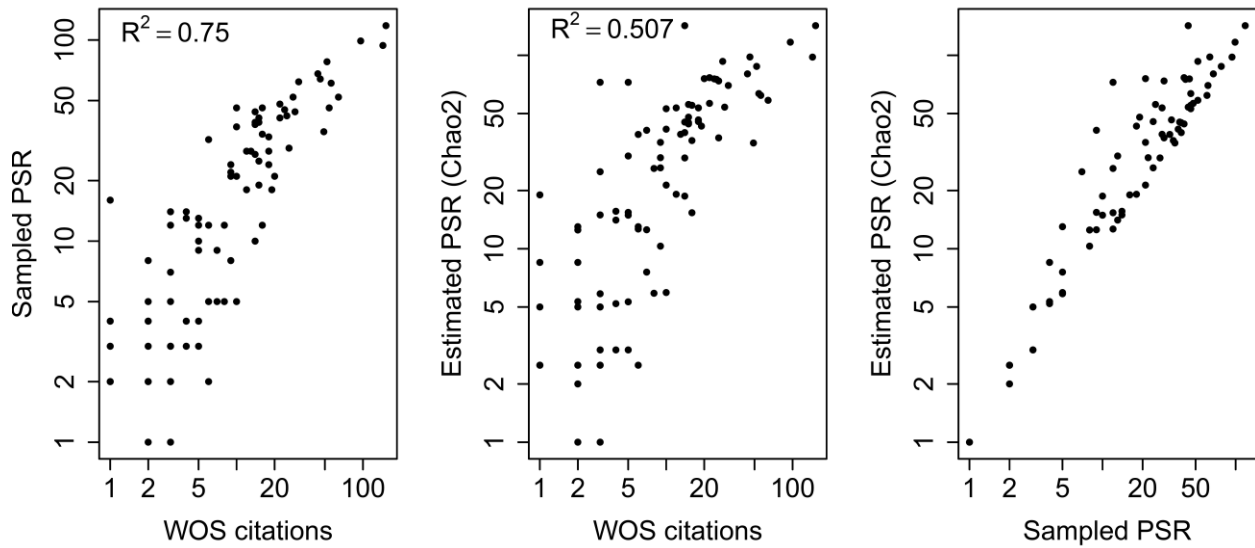

**Figure S1:** Effects of sampling effort on sampled and estimated parasite species richness (PSR) in the Global Mammal Parasite Database (GMPD). Sampled PSR is closely related to sampling effort, measured as the number of studies of a given host species in the GMPD ( $R^2=0.750$ , A). The bias-corrected Chao2 estimator reduces the strength of this relationship ( $R^2=0.507$ , B). Estimated PSR is always equal to or greater than sampled PSR (C).

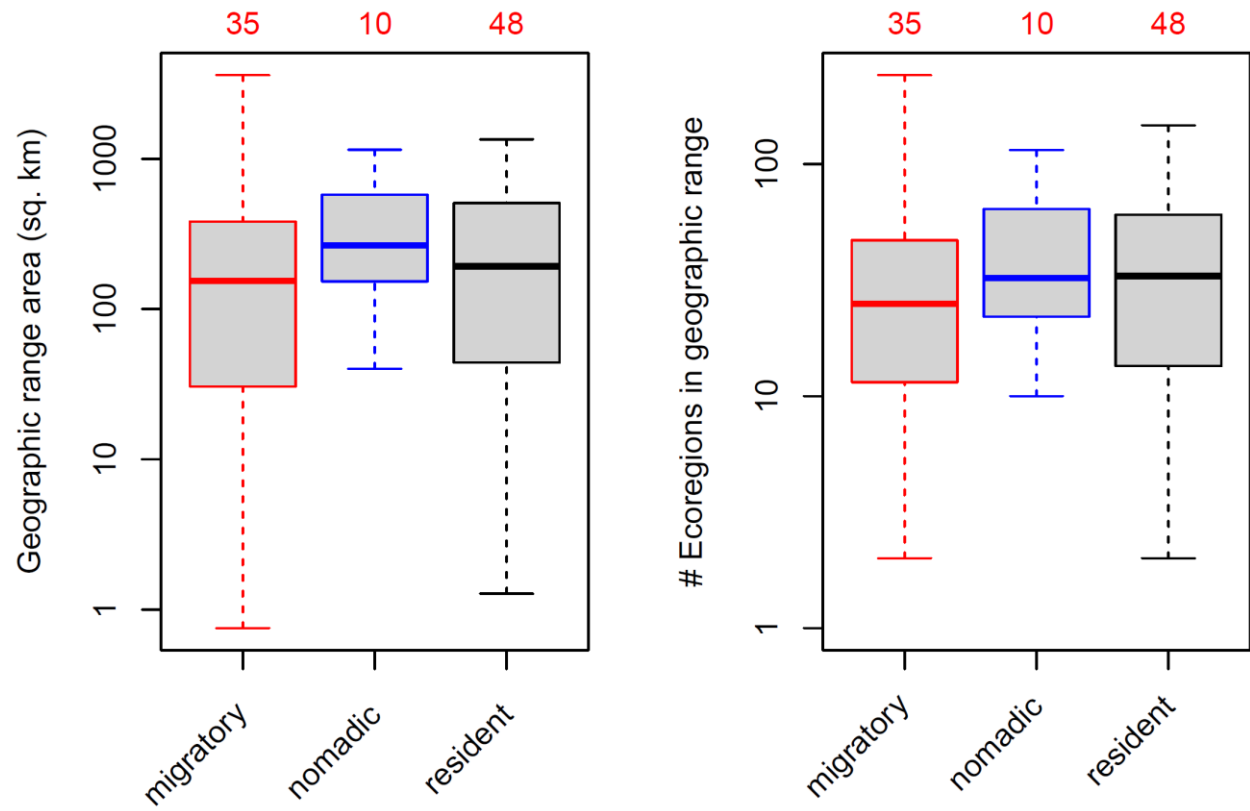

**Figure S2:** Geographic range size and habitat diversity of ungulate species with different movement strategies. No differences between groups were statistically significant (Tukey test,  $\alpha=0.05$ ).



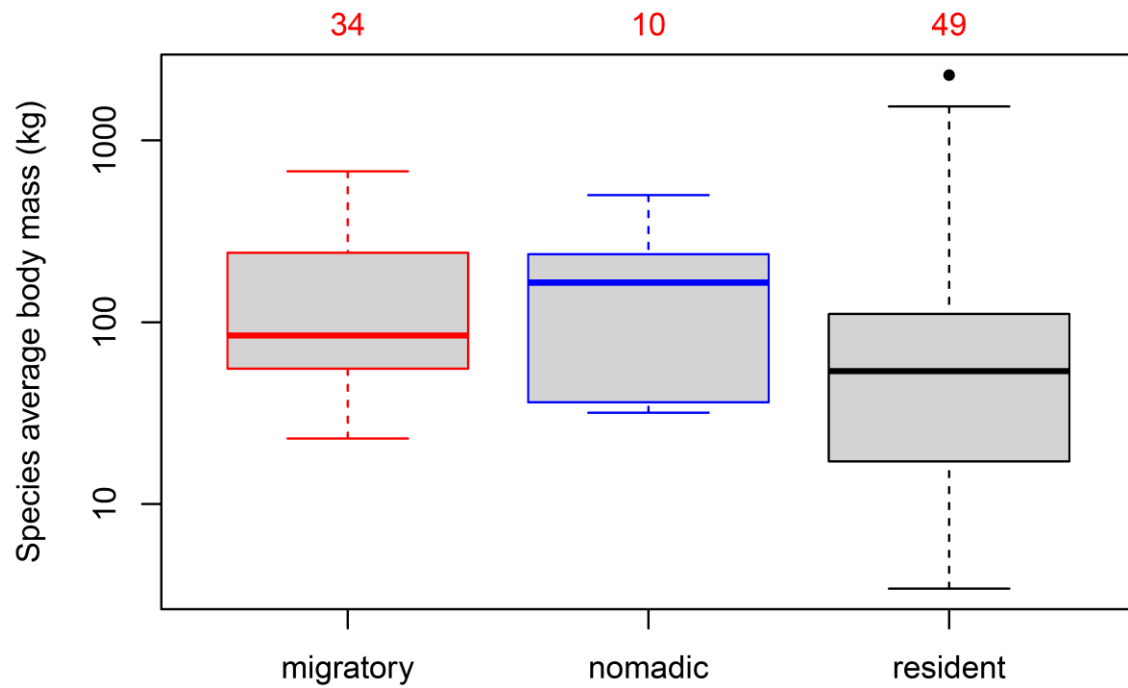

**Figure S3:** Average body mass of species with different movement modes. Resident species had, on average, marginally lower body mass than migratory species (Tukey test,  $p=0.050$ ); nomadic species were not statistically distinguishable from either other group.

**Table S1:** Model results from the averaged model of the four best models predicting parasite species richness using an alternative classification of movement, where we excluded species categorized as both migratory and nomadic (N=12 species excluded). Results are quantitatively and qualitatively similar to the hierarchical classification method (Table 1). As in the main model, geographic range area was included as a possible predictor but was not present in any of the top models.

|                    | <b>Estimate</b> | <b>Lower</b> | <b>Upper</b> |
|--------------------|-----------------|--------------|--------------|
| Intercept          | 1.780           | 0.388        | 3.173        |
| nomadic            | -1.326          | -2.211       | -0.44        |
| resident           | -0.788          | -1.377       | -0.199       |
| Habitat diversity  | 0.362           | 0.094        | 0.629        |
| Body mass          | 0.083           | -0.125       | 0.291        |
| Mid-range latitude | 0.004           | -0.01        | 0.018        |

**Table S2:** Model results from the averaged model of the four best models predicting parasite species richness using an alternative classification of movement, where we included “migratory/nomadic” as a fourth movement category. Results are quantitatively and qualitatively similar to the hierarchical classification method (Table 1). As in the main model, geographic range area was included as a possible predictor but was not present in any of the top models.

|                       | <b>Estimate</b> | <b>Lower</b> | <b>Upper</b> |
|-----------------------|-----------------|--------------|--------------|
| Intercept             | 1.878           | 0.449        | 3.307        |
| migratory and nomadic | -0.152          | -1.016       | 0.712        |
| nomadic               | -1.387          | -2.328       | -0.446       |
| resident              | -0.847          | -1.516       | -0.178       |
| Habitat diversity     | 0.324           | -0.008       | 0.657        |
| Body mass             | 0.088           | -0.124       | 0.3          |
| Mid-range latitude    | 0.004           | -0.01        | 0.017        |
| Geographic range area | 0.015           | -0.083       | 0.113        |

**Table S3:** AICc values for all candidate models predicting total parasite species richness.  $\Delta\text{AICc}$  is the difference in AICc between a given model and the top model; models where  $\Delta\text{AICc} < 2$  (in bold) are considered competitive.

| Model                                                                | AICc           | $\Delta\text{AICc}$ | weight       |
|----------------------------------------------------------------------|----------------|---------------------|--------------|
| <b>movementMode + log(nEcoregions) + log(bodyMass)</b>               | <b>305.953</b> | <b>0</b>            | <b>0.221</b> |
| <b>movementMode + log(nEcoregions) + log(bodyMass) + abs(midLat)</b> | <b>306.215</b> | <b>0.262</b>        | <b>0.194</b> |
| <b>movementMode + log(nEcoregions)</b>                               | <b>306.555</b> | <b>0.602</b>        | <b>0.163</b> |
| <b>movementMode + log(nEcoregions) + abs(midLat)</b>                 | <b>306.877</b> | <b>0.924</b>        | <b>0.139</b> |
| movementMode + log(geoAreaIUCN) + log(bodyMass)                      | 308.044        | 2.091               | 0.078        |
| movementMode + log(geoAreaIUCN) + log(bodyMass) + abs(midLat)        | 308.945        | 2.992               | 0.049        |
| movementMode + log(geoAreaIUCN)                                      | 309.427        | 3.474               | 0.039        |
| movementMode + log(bodyMass)                                         | 310.168        | 4.215               | 0.027        |
| movementMode + log(geoAreaIUCN) + abs(midLat)                        | 310.43         | 4.477               | 0.024        |
| log(nEcoregions) + log(bodyMass) + abs(midLat)                       | 311.167        | 5.214               | 0.016        |
| movementMode                                                         | 311.607        | 5.654               | 0.013        |
| movementMode + log(bodyMass) + abs(midLat)                           | 311.885        | 5.932               | 0.011        |
| movementMode + abs(midLat)                                           | 312.649        | 6.696               | 0.008        |
| log(nEcoregions) + abs(midLat)                                       | 313.413        | 7.46                | 0.005        |
| log(nEcoregions) + log(bodyMass)                                     | 314.374        | 8.421               | 0.003        |
| log(geoAreaIUCN) + log(bodyMass) + abs(midLat)                       | 314.913        | 8.96                | 0.003        |
| log(bodyMass) + abs(midLat)                                          | 315.285        | 9.332               | 0.002        |
| log(bodyMass)                                                        | 316.658        | 10.705              | 0.001        |
| log(geoAreaIUCN) + log(bodyMass)                                     | 316.707        | 10.754              | 0.001        |
| log(nEcoregions)                                                     | 316.745        | 10.792              | 0.001        |
| log(geoAreaIUCN) + abs(midLat)                                       | 316.92         | 10.967              | 0.001        |
| log(geoAreaIUCN)                                                     | 318.161        | 12.208              | 0            |
| abs(midLat)                                                          | 319.39         | 13.437              | 0            |

**Table S4:** Model results from the best average model of parasite species richness explicitly considering sampling effort. The model predicted raw parasite species richness (log); candidate independent variables were WOS citations (log), movement strategy, habitat diversity (log), body mass (log), absolute mid-range latitude, and geographic range area (log).

|                    | <b>Estimate</b> | <b>Lower</b> | <b>Upper</b> |
|--------------------|-----------------|--------------|--------------|
| Intercept          | 0.878           | -0.147       | 1.904        |
| nomadic            | -1.74           | -2.408       | -1.071       |
| resident           | -0.724          | -1.271       | -0.176       |
| Habitat diversity  | 0.131           | -0.156       | 0.419        |
| Sampling effort    | 0.33            | 0.141        | 0.519        |
| Mid-range latitude | -0.002          | -0.012       | 0.008        |
| Body mass          | 0.012           | -0.074       | 0.098        |

**Table S5:** Model results from models predicting estimated species richness of parasites transmitted by close contact and environmentally separately, using the same predictors as the top-ranked model for total parasite species richness. Transmission modes were based on assignments in the GMPD; environmental transmission is assigned as “nonclose” in the GMPD.

|                   | Environmental |        |        | Contact  |        |        |
|-------------------|---------------|--------|--------|----------|--------|--------|
|                   | Estimate      | Lower  | Upper  | Estimate | Lower  | Upper  |
| (Intercept)       | 1.906         | 0.781  | 3.031  | 0.013    | -1.274 | 1.3    |
| nomadic           | -1.832        | -2.697 | -0.968 | -0.848   | -1.672 | -0.025 |
| resident          | -0.402        | -0.93  | 0.127  | -0.573   | -1.069 | -0.078 |
| Habitat diversity | 0.183         | -0.144 | 0.509  | 0.293    | 0.044  | 0.542  |
| Body mass         | -             | -      | -      | 0.132    | -0.094 | 0.358  |
